# Supplementary material for: Factors Affecting Resilience of Nursing, Optometry, Radiography and Medical Laboratory Science Students
Source: PubMed Central journal article supplement (PMC8067740; doi:10.3390/ijerph18083867), 2021-04-07
Supplement: ijerph-18-03867-s001.pdf [file ijerph-18-03867-s001.pdf]

**Supplementary Table S1.** Summary of Chi-square and Pairwise Z-Tests. (Only significant pairs were shown)

| Chi-square and Post hoc test*        | University Nursing (N=1070)   | University Medical Laboratory Science (N=133) | University Radiography (N=65) | University Optometry (N=52) | Comparison among different groups of students |
|--------------------------------------|-------------------------------|-----------------------------------------------|-------------------------------|-----------------------------|-----------------------------------------------|
| Characteristics of Students          | (A)                           | (B)                                           | (C)                           | (D)                         | $\chi^2$ , df, Phi, p                         |
| Age                                  |                               |                                               |                               |                             |                                               |
| ≤ 18                                 | B(.000)                       | A(.000)<br>C(.021)                            | B(.021)                       |                             |                                               |
| 19-20                                | B(.000)<br>C(.000)<br>D(.000) | A(.000)                                       | A(.000)                       | A(.000)                     | 109.63, 9, 0.29,<br><b>p&lt;0.001</b>         |
| 21-22                                | B(.011)<br>D(.007)            | A(.011)                                       |                               | A(.007)                     |                                               |
| ≥ 23                                 | B(.000)<br>C(.005)            | A(.000)                                       | A(.005)                       |                             |                                               |
| Gender                               | B(.015)<br>C(.000)<br>D(.000) | A(0.015)<br>C(0.000)                          | A(.000)<br>B(.000)            | A(.000)                     | 82.80, 3, 0.26,<br><b>p&lt;0.001</b>          |
| Year of Study                        |                               |                                               |                               |                             |                                               |
| Year 1                               | B(.000)                       | A(.000)                                       |                               |                             | 269.39, 9, 0.45,<br><b>p&lt;0.001</b>         |
| Year 2                               | B(.004)                       | A(.004)                                       |                               |                             |                                               |
| Year 3                               |                               |                                               |                               |                             |                                               |
| Year 4                               | B(.000)                       | A(.000)                                       |                               |                             |                                               |
| Cumulative Grade Point Average       |                               |                                               |                               |                             |                                               |
| 2-2.5                                |                               |                                               |                               |                             | 170.98, 9, 0.36,<br><b>p&lt;0.001</b>         |
| 2.6-3                                | B(.000)<br>C(.000)            | A(.000)                                       | A(.000)                       |                             |                                               |
| 3.1-3.5                              | C(.004)                       |                                               | A(.004)<br>D(.017)            | C(.017)                     |                                               |
| ≥ 3.6                                | B(.000)<br>C(.001)<br>D(.000) | A(.000)                                       | A(.001)                       | A(.000)                     |                                               |
| Reasons of Studying                  | C(.000)                       | C(.000)                                       | A(.000)<br>B(.000)<br>D(.003) | C(.003)                     | 25.30, 3, 0.14,<br><b>p&lt;0.001</b>          |
| Family Responsibility                | B(.003)                       | A(.003)                                       |                               |                             | 18.98, 3, 0.12,<br><b>p&lt;0.001</b>          |
| Financial Assistance                 | B(.022)                       | A(.022)                                       |                               |                             | 13.93, 3, 0.10,<br><b>p=0.003</b>             |
| Scholarship from Government          | C(.027)                       |                                               | A(.027)                       |                             | 10.57, 3, 0.09,<br><b>p=0.01</b>              |
| Scholarship from University/Hospital | B(.000)<br>D(.001)            | A(.000)                                       |                               | A(.001)                     | 50.21, 3, 0.20,<br><b>p&lt;0.001</b>          |

\*Pairwise Z-Tests with Bonferroni adjustment

**Supplementary Table S2.** Summary of One-way ANOVA and Post hoc Tukey test. (Only significant pairs were shown)

| Post Hoc Tests           | University<br>Nursing<br>(N=1070) | University<br>Medical<br>Laboratory<br>Science<br>(N=133) | University<br>Radiography<br>(N=65) | University<br>Optometry<br>(N=52) | One-way ANOVA                       |
|--------------------------|-----------------------------------|-----------------------------------------------------------|-------------------------------------|-----------------------------------|-------------------------------------|
| Study Scales             | (A)                               | (B)                                                       | (C)                                 | (D)                               |                                     |
| PANAS                    |                                   |                                                           |                                     |                                   |                                     |
| PAS                      |                                   |                                                           |                                     |                                   | F(3, 1316)=0.90, p=0.44             |
| NAS                      | D(.002)                           | D(.001)                                                   |                                     | A(.002)<br>B(.001)                | F(3, 1316)=5.13, <b>p=0.002</b>     |
| GSE                      | C(.005)                           |                                                           | A(.005)<br>D(.007)                  | C(.007)                           | F(3, 1316)=5.89, <b>p=0.001</b>     |
| CAMS-R                   | D(.017)                           | D(.006)                                                   |                                     | A(0.017)<br>B(.006)               | F(3, 1316)=4.10, <b>p=0.007</b>     |
| CD-RISC                  |                                   |                                                           |                                     |                                   | F(3, 1316)=2.15, p=0.09             |
| BCS                      |                                   |                                                           |                                     |                                   |                                     |
| Self-distraction         |                                   |                                                           |                                     |                                   | F(3, 1316)=1.49, p=0.22             |
| Active coping            |                                   |                                                           |                                     |                                   | F(3, 1316)=1.51, p=0.21             |
| Denial                   | B(.020)<br>C(.009)                | A(.020)                                                   | A(.009)                             |                                   | F(3, 1316)=5.76, <b>p&lt;0.001</b>  |
| Substance use            | C(<.001)                          | C(<.001)                                                  | A(<.001)<br>B(<.001)<br>D(<.001)    | C(<.001)                          | F(3, 1316)=10.90, <b>p&lt;0.001</b> |
| Use emotional support    |                                   |                                                           |                                     |                                   | F(3, 1316)=2.48, p=0.06             |
| Use instrumental support | B(.028)<br>D(.024)                | A(.028)                                                   |                                     | A(.024)                           | F(3, 1316)=5.30, <b>p=0.001</b>     |
| Behavioral disengagement | C(.035)                           |                                                           | A(.035)                             |                                   | F(3, 1316)=2.87, <b>p=0.04</b>      |
| Venting                  |                                   |                                                           |                                     |                                   | F(3, 1316)=1.24, p=0.29             |
| Positive reframing       |                                   |                                                           |                                     |                                   | F(3, 1316)=1.01, p=0.39             |
| Planning                 |                                   |                                                           |                                     |                                   | F(3, 1316)=0.94, p=0.42             |
| Humor                    |                                   |                                                           |                                     |                                   | F(3, 1316)=1.62, p=0.18             |
| Acceptance               | D(.014)                           |                                                           |                                     | A(.014)                           | F(3, 1316)=3.31, <b>p=0.02</b>      |
| Religion                 | D(.005)                           |                                                           |                                     | A(.005)                           | F(3, 1316)=5.06, <b>p=0.002</b>     |
| Self-blame               |                                   |                                                           |                                     |                                   | F(3, 1316)=1.78, p=0.15             |

Note: Positive and Negative Affect Scale (PANAS); General Self-Efficacy Scale (GSE); Cognitive and Affective Mindfulness Scale, Revised (CAMS-R); Connor-Davidson Resilience Scale (CD-RISC); Brief Cope Scale (BCS).

\*Tukey's HSD (honestly significant difference) test

**Supplementary Table S3.** Univariate linear regressions to determine the correlation between independent variables and resilience in all students and four student groups (N=1320).

| Variables                      | Total (N=1320) |              |              | Nursing (N=1070) |              |              | Medical Laboratory Science (N=133) |             |              | Radiography (N=65) |              |      | Optometry (N=52) |             |      |
|--------------------------------|----------------|--------------|--------------|------------------|--------------|--------------|------------------------------------|-------------|--------------|--------------------|--------------|------|------------------|-------------|------|
|                                | B              | 95% CI       | p            | B                | 95% CI       | p            | B                                  | 95% CI      | p            | B                  | 95% CI       | p    | B                | 95% CI      | p    |
| Age                            | -0.38          | -0.73, -0.03 | <b>0.03*</b> | -0.34            | -0.72, 0.04  | 0.08         | 0.19                               | -0.95, 1.32 | 0.74         | -1.66              | -4.18, 0.85  | 0.19 | -1.18            | -3.87, 1.51 | 0.38 |
| Gender                         |                |              |              |                  |              |              |                                    |             |              |                    |              |      |                  |             |      |
| Male                           |                |              |              |                  |              |              |                                    |             |              |                    |              |      |                  |             |      |
| Female                         | -0.51          | -1.17, 0.14  | 0.12         | -0.78            | -1.53, -0.04 | <b>0.04*</b> | 1.24                               | 0.68, 3.15  | 0.21         | -0.25              | -3.93, 3.43  | 0.89 | -1.03            | -4.92, 2.87 | 0.60 |
| Marital Status                 |                |              |              |                  |              |              |                                    |             |              |                    |              |      |                  |             |      |
| Single                         |                |              |              |                  |              |              |                                    |             |              |                    |              |      |                  |             |      |
| Non-single                     | 0.23           | -2.30, 2.76  | 0.86         | 0.48             | -2.16, 3.11  | 0.72         | NA <sup>2</sup>                    | NA          | NA           | -1.89              | -11.23, 7.46 | 0.69 | NA <sup>2</sup>  | NA          | NA   |
| Year of Study                  | -0.20          | -0.48, 0.07  | 0.15         | -0.27            | -0.56, 0.02  | 0.07         | 0.96                               | 0.08, 1.85  | <b>0.03*</b> |                    |              |      | NA <sup>1</sup>  |             |      |
| Cumulative Grade Point Average | 0.15           | -0.25, 0.55  | 0.47         | 0.11             | -0.36, 0.57  | 0.65         | 0.15                               | -1.03, 1.32 | 0.80         | 0.55               | -2.00, 3.10  | 0.67 | -0.83            | -2.80, 1.15 | 0.41 |
| Living                         |                |              |              |                  |              |              |                                    |             |              |                    |              |      |                  |             |      |
| With family                    |                |              |              |                  |              |              |                                    |             |              |                    |              |      |                  |             |      |
| Alone                          | -0.17          | -1.31, 0.98  | 0.77         | -0.25            | -1.49, 0.99  | 0.69         | -1.55                              | -5.87, 2.78 | 0.48         | 3.47               | -3.18, 10.11 | 0.30 | -1.64            | -7.12, 3.84 | 0.55 |
| Religious Beliefs              |                |              |              |                  |              |              |                                    |             |              |                    |              |      |                  |             |      |
| Yes                            |                |              |              |                  |              |              |                                    |             |              |                    |              |      |                  |             |      |
| No                             | 0.56           | -0.11, 1.22  | 0.10         | 0.49             | -0.22, 1.20  | 0.17         | 0.95                               | -1.15, 3.04 | 0.37         | -2.05              | -6.17, 2.07  | 0.32 | 4.38             | -0.02, 8.77 | 0.05 |
| Reasons of Studying            |                |              |              |                  |              |              |                                    |             |              |                    |              |      |                  |             |      |
| Multiple reasons               |                |              |              |                  |              |              |                                    |             |              |                    |              |      |                  |             |      |
| One of the reasons             | 0.60           | -0.07, 1.27  | 0.08         | 0.52             | -0.22, 1.25  | 0.17         | 1.62                               | -0.63, 3.87 | 0.16         | -0.38              | -3.60, 2.84  | 0.82 | 2.84             | -1.82, 7.51 | 0.23 |
| Family Responsibility          |                |              |              |                  |              |              |                                    |             |              |                    |              |      |                  |             |      |
| Dependent                      |                |              |              |                  |              |              |                                    |             |              |                    |              |      |                  |             |      |
| No                             | 0.39           | -0.37, 1.16  | 0.31         | -0.13            | -1.01, 0.75  | 0.77         | 1.28                               | -0.72, 3.27 | 0.21         | 3.21               | -0.48, 6.90  | 0.09 | 1.36             | -2.74, 5.46 | 0.51 |

|                                      |       |              |                    |       |              |                    |       |              |                    |       |              |                    |       |              |                    |  |
|--------------------------------------|-------|--------------|--------------------|-------|--------------|--------------------|-------|--------------|--------------------|-------|--------------|--------------------|-------|--------------|--------------------|--|
| Financial Assistance                 |       |              |                    |       |              |                    |       |              |                    |       |              |                    |       |              |                    |  |
| More than one assistance             | -0.53 | -1.12, 0.06  | 0.08               | -0.67 | -1.31, -0.03 | <b>0.04*</b>       | -0.18 | -2.08, 1.72  | 0.85               | 0.48  | -2.93, 3.88  | 0.78               | 0.99  | -2.97, 4.96  | 0.50               |  |
| No                                   |       |              |                    |       |              |                    |       |              |                    |       |              |                    |       |              |                    |  |
| Scholarship (Government)             |       |              |                    |       |              |                    |       |              |                    |       |              |                    |       |              |                    |  |
| Yes                                  | 0.07  | -1.51, 1.66  | 0.93               | 0.53  | -1.37, 2.43  | 0.59               | 1.90  | -2.42, 6.22  | 0.39               | -3.13 | -8.68, 2.42  | 0.26               | -1.73 | -8.71, 5.25  | 0.62               |  |
| No                                   |       |              |                    |       |              |                    |       |              |                    |       |              |                    |       |              |                    |  |
| Scholarship<br>(University/Hospital) |       |              |                    |       |              |                    |       |              |                    |       |              |                    |       |              |                    |  |
| Yes                                  | 0.54  | -0.52, 1.59  | 0.32               | 0.82  | -0.53, 2.16  | 0.23               | -1.19 | -3.33, 0.95  | 0.27               | 0.21  | -5.02, 5.45  | 0.94               | 2.61  | -2.07, 7.28  | 0.27               |  |
| No                                   |       |              |                    |       |              |                    |       |              |                    |       |              |                    |       |              |                    |  |
| Paid Job                             |       |              |                    |       |              |                    |       |              |                    |       |              |                    |       |              |                    |  |
| Yes                                  | 0.49  | -0.12, 1.09  | 0.12               | 0.42  | -0.24, 1.08  | 0.21               | 0.36  | -1.52, 2.24  | 0.71               | -2.14 | -5.37, 1.09  | 0.19               | 5.60  | 2.11, 9.09   | <b>0.002**</b>     |  |
| No                                   |       |              |                    |       |              |                    |       |              |                    |       |              |                    |       |              |                    |  |
| GSE                                  | 0.90  | 0.84, 0.96   | <b>&lt;0.001**</b> | 0.89  | 0.83, 0.96   | <b>&lt;0.001**</b> | 0.83  | 0.64, 1.01   | <b>&lt;0.001**</b> | 0.90  | 0.56, 1.24   | <b>&lt;0.001**</b> | 1.32  | 1.02, 1.62   | <b>&lt;0.001**</b> |  |
| CAMS-R                               | 0.92  | 0.86, 0.99   | <b>&lt;0.001**</b> | 0.92  | 0.85, 1.00   | <b>&lt;0.001**</b> | 0.81  | 0.61, 1.02   | <b>&lt;0.001**</b> | 1.19  | 0.79, 1.60   | <b>&lt;0.001**</b> | 1.00  | 0.58, 1.42   | <b>&lt;0.001**</b> |  |
| PANAS                                |       |              |                    |       |              |                    |       |              |                    |       |              |                    |       |              |                    |  |
| PAS                                  | 0.32  | 0.28, 0.37   | <b>&lt;0.001**</b> | 0.34  | 0.30, 0.39   | <b>&lt;0.001**</b> | 0.19  | 0.06, 0.32   | <b>0.004**</b>     | 0.15  | -0.70, 0.38  | 0.17               | 0.66  | 0.39, 0.92   | <b>&lt;0.001**</b> |  |
| NAS                                  | -0.25 | -0.29, -0.22 | <b>&lt;0.001**</b> | -0.24 | -0.28, -0.20 | <b>&lt;0.001**</b> | -0.33 | -0.42, -0.23 | <b>&lt;0.001**</b> | -0.21 | -0.38, -0.04 | <b>0.02*</b>       | -0.30 | -0.55, -0.06 | <b>0.02*</b>       |  |

---



---

|                          |       |              |          |       |              |          |       |              |          |       |             |          |       |              |          |
|--------------------------|-------|--------------|----------|-------|--------------|----------|-------|--------------|----------|-------|-------------|----------|-------|--------------|----------|
| BCS                      |       |              |          |       |              |          |       |              |          |       |             |          |       |              |          |
| Self-distraction         | 0.89  | 0.61, 1.16   | <0.001** | 0.81  | 0.49, 1.12   | <0.001** | 1.32  | 0.53, 2.10   | 0.001**  | -0.06 | -1.61, 1.50 | 0.94     | 1.56  | 0.28, 2.85   | 0.02*    |
| Active coping            | 2.04  | 1.72, 2.36   | <0.001** | 1.99  | 1.64, 2.34   | <0.001** | 2.15  | 1.22, 3.09   | <0.001** | 2.44  | 0.75, 4.13  | 0.005**  | 2.07  | 0.50, 3.64   | 0.01*    |
| Denial                   | 2.41  | 2.16, 2.65   | <0.001** | 2.44  | 2.17, 2.71   | <0.001** | 1.80  | 1.08, 2.51   | <0.001** | 2.68  | 1.52, 3.85  | <0.001** | 3.11  | 1.68, 4.53   | <0.001** |
| Substance use            | -0.15 | -0.36, 0.06  | 0.17     | -0.20 | -0.43, 0.04  | 0.10     | 0.19  | -0.49, 0.87  | 0.58     | -0.39 | -1.33, 0.55 | 0.41     | 0.50  | -1.27, 2.26  | 0.57     |
| Use emotional support    | 0.78  | 0.54, 1.02   | <0.001** | 0.82  | 0.55, 1.09   | <0.001** | 0.34  | -0.41, 1.10  | 0.37     | 0.29  | -0.12, 1.69 | 0.69     | 1.37  | 0.23, 2.50   | 0.02*    |
| Use instrumental support | 0.77  | 0.53, 1.00   | <0.001** | 0.78  | 0.52, 1.05   | <0.001** | 0.61  | -0.03, 1.25  | 0.06     | 0.49  | -0.82, 1.80 | 0.46     | 1.34  | 0.17, 2.51   | 0.03*    |
| Behavioral disengagement | -0.70 | -0.93, -0.48 | <0.001** | -0.78 | -1.03, -0.53 | <0.001** | -0.18 | -0.85, 0.48  | 0.59     | -1.16 | -2.35, 0.04 | 0.06     | -0.52 | -1.85, 0.81  | 0.43     |
| Venting                  | 0.09  | -0.18, 0.36  | 0.50     | 0.11  | -0.18, 0.41  | 0.46     | -0.06 | -0.78, 0.67  | 0.88     | -0.08 | -1.58, 1.41 | 0.91     | 0.29  | -1.43, 2.02  | 0.74     |
| Positive reframing       | 2.09  | 1.83, 2.35   | <0.001** | 2.21  | 1.92, 2.50   | <0.001** | 1.94  | 1.25, 2.63   | <0.001** | 1.47  | -0.15, 3.09 | 0.07     | 1.06  | -0.64, 2.76  | 0.22     |
| Planning                 | 1.32  | 1.02, 1.61   | <0.001** | 1.45  | 1.13, 1.78   | <0.001** | 0.36  | -0.48, 1.20  | 0.40     | 1.82  | 0.15, 3.49  | 0.03*    | 1.01  | -0.63, 2.65  | 0.22     |
| Humor                    | 1.50  | 1.29, 1.70   | <0.001** | 1.48  | 1.25, 1.71   | <0.001** | 1.31  | 0.73, 1.90   | <0.001** | 1.75  | 0.43, 3.07  | 0.01*    | 2.01  | 0.76, 3.25   | 0.002**  |
| Acceptance               | 1.92  | 1.63, 2.21   | <0.001** | 2.17  | 1.84, 2.49   | <0.001** | 0.70  | -0.12, 1.52  | 0.10     | 1.66  | 0.11, 3.21  | 0.04*    | 1.85  | 0.53, 3.17   | 0.01*    |
| Religion                 | 0.44  | 0.27, 0.62   | <0.001** | 0.40  | 0.21, 0.60   | <0.001** | 0.69  | 0.17, 1.21   | 0.01*    | 0.69  | -0.42, 1.80 | 0.22     | 0.40  | -0.86, 1.65  | 0.53     |
| Self-blame               | -0.67 | -0.90, -0.44 | <0.001** | -0.59 | -0.85, -0.34 | <0.001** | -0.85 | -1.47, -0.24 | 0.01*    | -0.69 | -2.07, 0.69 | 0.32     | -1.34 | -2.57, -0.12 | 0.03*    |

---

Note: NA<sup>1</sup> the students are in the same year of study, statistics cannot be computed; NA<sup>2</sup> no students

Positive and Negative Affect Scale (PANAS); General Self-Efficacy Scale (GSE); Cognitive and Affective Mindfulness Scale, Revised (CAMS-R); Connor-Davidson Resilience Scale (CD-RISC); Brief Cope Scale (BCS); \*p<0.05; \*\*p<0.01.
